# Supplementary material
Source: PubMed Central journal article supplement (PMC7099180)
Supplement: jcsm.15.12.1777.SD1.pdf [file jcsm.15.12.1777.SD1.pdf]

**Figure S1**—Flow chart.

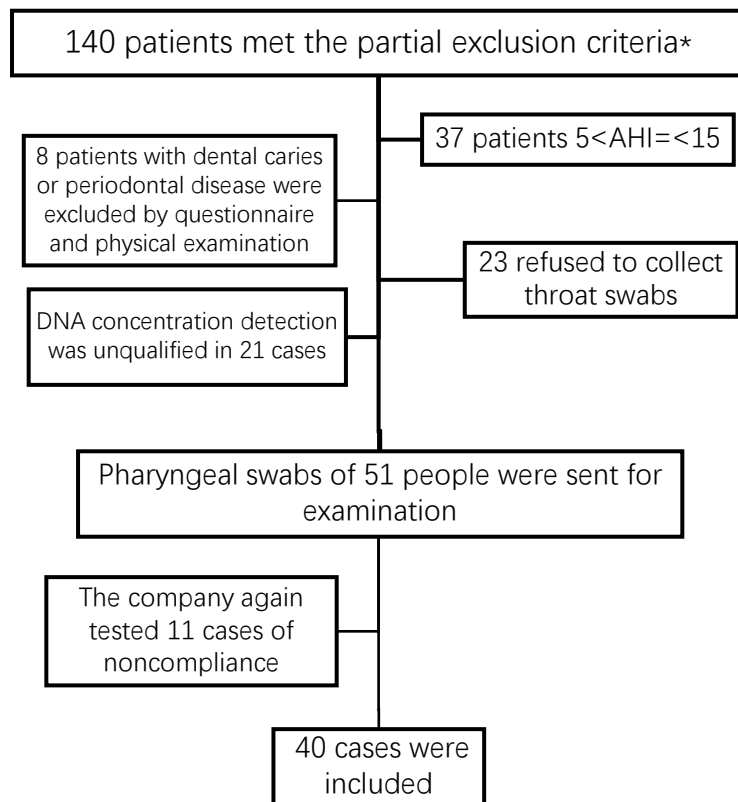

\*partial exclusion criteria: history of atherosclerotic disease (myocardial infarction or stroke  $< 6$  months), congestive heart failure, diabetes, thyroid disease, acute and chronic respiratory diseases, systemic infections, and with a therapy for 4 weeks prior to study entry with inhaled, oral, or nasal steroids or usage of other anti-inflammatory drugs and central sleep apnea. Subjects who contacted productive dust, poisonous gas, and substance abuse were also excluded by personal history.
